# Supplementary material for: Proteostatic reactivation of the developmental transcription factor TBX3 drives BRAF/MAPK-mediated tumorigenesis
Source: Nat Commun. 2024 May 15;15:4108. doi: 10.1038/s41467-024-48173-9 (PMC11096176; doi:10.1038/s41467-024-48173-9)
Supplement: Supplementary file 4 — Supplementary Data 1 [file 41467_2024_48173_MOESM4_ESM.xlsx]

## Sheet: summary
Accession	Protein names	Gene names	MW [kDa]	Protein score	Sequence coverage (%)	# Unique Peptides	# Peptides	# PSMs
P52732	Kinesin-like protein KIF11	KIF11	119.085	3606.02	45.17	55	55	95
P35579	Myosin-9	MYH9	226.392	3020.26	33.62	50	59	76
Q6P3W7	SCY1-like protein 2	SCYL2	103.642	2419.63	38.64	32	32	61
O15119	T-box transcription factor TBX3	TBX3	79.3387	1883.16	30.55	20	20	46
P21333	Filamin-A	FLNA	280.564	1863.25	26.67	48	52	56
P60709	Actin, cytoplasmic 1	ACTB	41.7097	1851.23	66.67	1	21	51
P63261	Actin, cytoplasmic 2	ACTG1	41.7658	1835.33	66.67	1	21	51
O14744	Protein arginine N-methyltransferase 5	PRMT5	72.6376	1744.92	45.05	25	25	55
P11142	Heat shock cognate 71 kDa protein	HSPA8	70.8542	1732.48	38.54	22	25	45
Q01082	Spectrin beta chain, non-erythrocytic 1	SPTBN1	274.439	1591.12	19.67	39	39	39
P04264	Keratin, type II cytoskeletal 1	KRT1	65.999	1555.02	43.01	20	23	35
P0DMV8	Heat shock 70 kDa protein 1A	HSPA1A	70.009	1499.44	34.32	20	22	43
Q13813	Spectrin alpha chain, non-erythrocytic 1	SPTAN1	284.364	1474.77	18.53	38	38	40
Q15208	Serine/threonine-protein kinase 38	STK38	54.1554	1315.75	53.55	17	23	35
P11021	Endoplasmic reticulum chaperone BiP	HSPA5	72.2884	1270.52	44.65	23	25	30
O75688	Protein phosphatase 1B	PPM1B	52.6094	1236.09	49.27	16	19	36
P23458	Tyrosine-protein kinase JAK1	JAK1	133.191	1235.99	26.08	26	26	32
P98175	RNA-binding protein 10	RBM10	103.469	1211.29	27.96	23	23	30
O75533	Splicing factor 3B subunit 1	SF3B1	145.738	1203	26.61	26	26	32
P35580	Myosin-10	MYH10	228.858	1202.3	15.59	18	27	33
P38646	Stress-70 protein, mitochondrial	HSPA9	73.6348	1120.04	39.03	21	21	25
Q15393	Splicing factor 3B subunit 3	SF3B3	135.492	1030.02	19.97	20	20	24
P68032	Actin, alpha cardiac muscle 1	ACTC1	41.9919	992.421	29.44	1	12	33
P52272	Heterogeneous nuclear ribonucleoprotein M	HNRNPM	77.4643	951.132	27.4	17	17	23
P35908	Keratin, type II cytoskeletal 2 epidermal	KRT2	65.3932	915.537	38.03	15	21	23
Q16875	6-phosphofructo-2-kinase/fructose-2,6-bisphosphatase 3	PFKFB3	59.5712	893.416	43.85	19	24	27
O43318	Mitogen-activated protein kinase kinase kinase 7	MAP3K7	67.1533	876.66	33	17	17	25
P13645	Keratin, type I cytoskeletal 10	KRT10	58.7917	855.934	30.99	14	15	19
Q9Y2H1	Serine/threonine-protein kinase 38-like	STK38L	53.9684	850.273	40.73	14	20	25
P36578	60S ribosomal protein L4	RPL4	47.6674	847.701	41.69	17	17	22
Q71U36	Tubulin alpha-1A chain	TUBA1A	50.1036	819.691	39.69	1	14	21
P68363	Tubulin alpha-1B chain	TUBA1B	50.1196	815.946	39.69	1	14	21
P61978	Heterogeneous nuclear ribonucleoprotein K	HNRNPK	50.9444	794.876	40.82	17	17	24
P68371	Tubulin beta-4B chain	TUBB4B	49.799	764.02	41.35	4	16	22
P07437	Tubulin beta chain	TUBB	49.639	756.36	37.61	3	15	23
O60825	6-phosphofructo-2-kinase/fructose-2,6-bisphosphatase 2	PFKFB2	58.4397	749.876	44.95	17	21	22
P11940	Polyadenylate-binding protein 1	PABPC1	70.6259	735.345	25.31	12	14	20
P14618	Pyruvate kinase PKM	PKM	57.9	730.308	33.9	16	16	18
Q9BQA1	Methylosome protein 50	WDR77	36.7011	721.95	32.16	9	9	18
P49327	Fatty acid synthase	FASN	273.254	716.113	9.88	19	19	19
O43143	Pre-mRNA-splicing factor ATP-dependent RNA helicase DHX15	DHX15	90.8752	696.939	22.52	18	18	21
P49411	Elongation factor Tu, mitochondrial	TUFM	49.5102	683.603	43.14	17	17	17
P35527	Keratin, type I cytoskeletal 9	KRT9	62.0268	675.779	26.48	14	14	16
Q02878	60S ribosomal protein L6	RPL6	32.7076	657.36	41.32	13	13	17
Q15750	TGF-beta-activated kinase 1 and MAP3K7-binding protein 1	TAB1	54.6104	648.066	30.75	13	13	15
Q9NXV2	BTB/POZ domain-containing protein KCTD5	KCTD5	26.0761	646.05	45.3	10	11	16
Q9Y2W1	Thyroid hormone receptor-associated protein 3	THRAP3	108.601	642.106	16.75	14	15	17
P17844	Probable ATP-dependent RNA helicase DDX5	DDX5	69.1047	638.274	26.22	13	16	17
P62424	60S ribosomal protein L7a	RPL7A	29.977	619.06	40.98	14	14	18
P08670	Vimentin	VIM	53.6191	616.474	34.12	15	15	16
Q00839	Heterogeneous nuclear ribonucleoprotein U	HNRNPU	90.528	612.84	17.09	13	13	16
Q92841	Probable ATP-dependent RNA helicase DDX17	DDX17	80.222	604.801	26.34	13	16	17
P31943	Heterogeneous nuclear ribonucleoprotein H	HNRNPH1	49.1984	603.403	27.39	4	10	15
O00571	ATP-dependent RNA helicase DDX3X	DDX3X	73.198	592.507	20.09	11	12	14
Q07955	Serine/arginine-rich splicing factor 1	SRSF1	27.7278	586.54	39.92	11	11	18
Q13435	Splicing factor 3B subunit 2	SF3B2	100.165	584.871	21.45	16	16	17
P13010	X-ray repair cross-complementing protein 5	XRCC5	82.6523	573.597	18.31	14	14	16
Q14681	BTB/POZ domain-containing protein KCTD2	KCTD2	28.5092	570.538	43.35	7	8	10
P25789	Proteasome subunit alpha type-4	PSMA4	29.4652	555.098	33.33	8	8	13
Q9Y657	Spindlin-1	SPIN1	29.5818	553.66	49.62	8	11	16
P10809	60 kDa heat shock protein, mitochondrial	HSPD1	61.0164	553.408	24.61	12	12	14
P62701	40S ribosomal protein S4, X isoform	RPS4X	29.5791	535.518	41.06	12	12	15
Q9ULV4	Coronin-1C	CORO1C	53.2151	534.451	21.1	11	11	13
P19338	Nucleolin	NCL	76.5684	529.845	18.03	14	14	15
Q9NZI8	Insulin-like growth factor 2 mRNA-binding protein 1	IGF2BP1	63.4412	528.465	20.28	8	9	10
Q08211	ATP-dependent RNA helicase A	DHX9	140.869	526.65	12.13	15	15	17
Q9NR30	Nucleolar RNA helicase 2	DDX21	87.2904	526.624	21.84	14	15	17
P61247	40S ribosomal protein S3a	RPS3A	29.9257	521.807	32.95	9	9	17
Q8WWY3	U4/U6 small nuclear ribonucleoprotein Prp31	PRPF31	55.4214	514.05	23.65	9	9	12
P00734	Prothrombin	F2	69.9921	501.677	6.59	5	5	11
O15013	Rho guanine nucleotide exchange factor 10	ARHGEF10	151.516	501.503	10.66	12	12	12
Q12906	Interleukin enhancer-binding factor 3	ILF3	95.2791	484.502	12.19	11	11	15
P68104	Elongation factor 1-alpha 1	EEF1A1	50.1091	482.664	25.54	11	11	15
Q9BUA3	SPIN1-docking protein	C11orf84	41.0114	482.035	44.09	10	10	13
Q14692	Ribosome biogenesis protein BMS1 homolog	BMS1	145.716	479.672	9.98	10	10	12
Q7L2E3	Putative ATP-dependent RNA helicase DHX30	DHX30	133.855	466.827	11.81	13	13	13
Q9NYF8	Bcl-2-associated transcription factor 1	BCLAF1	106.059	461.122	13.8	9	10	13
Q15459	Splicing factor 3A subunit 1	SF3A1	88.8305	456.454	22.95	13	13	15
P23588	Eukaryotic translation initiation factor 4B	EIF4B	69.1103	442.986	22.59	12	12	13
Q16643	Drebrin	DBN1	71.3854	442.805	23.11	13	13	13
P22626	Heterogeneous nuclear ribonucleoproteins A2/B1	HNRNPA2B1	37.4067	437.447	30.88	7	10	12
P14866	Heterogeneous nuclear ribonucleoprotein L	HNRNPL	64.0924	434.521	21.73	10	10	12
P42167	Lamina-associated polypeptide 2, isoforms beta/gamma	TMPO	50.6395	432.949	28.63	10	10	11
P67809	Nuclease-sensitive element-binding protein 1	YBX1	35.9027	430.712	37.65	6	8	8
P62753	40S ribosomal protein S6	RPS6	28.663	418.676	21.29	6	6	9
Q12905	Interleukin enhancer-binding factor 2	ILF2	43.0352	416.254	24.36	8	8	11
Q5SWX8	Protein odr-4 homolog	ODR4	51.0708	414.11	19.16	7	7	10
Q9BRS2	Serine/threonine-protein kinase RIO1	RIOK1	65.5417	405.626	18.13	8	8	11
P06396	Gelsolin	GSN	85.6442	398.808	12.02	9	9	11
P23396	40S ribosomal protein S3	RPS3	26.6714	395.983	55.97	13	13	14
O15294	UDP-N-acetylglucosamine--peptide N-acetylglucosaminyltransferase 110 kDa subunit	OGT	116.85	395.96	12.91	12	12	13
Q96HS1	Serine/threonine-protein phosphatase PGAM5, mitochondrial	PGAM5	31.9846	392.465	28.72	9	9	11
P55795	Heterogeneous nuclear ribonucleoprotein H2	HNRNPH2	49.2323	391.466	19.38	1	7	10
P55036	26S proteasome non-ATPase regulatory subunit 4	PSMD4	40.7112	388.121	25.73	8	8	10
P62241	40S ribosomal protein S8	RPS8	24.1902	387.353	54.81	10	10	11
P52292	Importin subunit alpha-1	KPNA2	57.8259	387.025	20.04	8	8	8
P07814	Bifunctional glutamate/proline--tRNA ligase	EPRS	170.483	383.403	8.8	11	11	11
P09651	Heterogeneous nuclear ribonucleoprotein A1	HNRNPA1	38.7231	381.626	19.09	5	8	9
P25705	ATP synthase subunit alpha, mitochondrial	ATP5F1A	59.7136	381.002	16.09	8	8	10
P25205	DNA replication licensing factor MCM3	MCM3	90.924	380.717	14.23	10	10	10
O94832	Unconventional myosin-Id	MYO1D	116.129	380.25	10.93	11	11	11
P05388	60S acidic ribosomal protein P0	RPLP0	34.2518	357.944	32.18	7	7	8
Q12874	Splicing factor 3A subunit 3	SF3A3	58.8123	352.469	17.96	8	8	10
P60842	Eukaryotic initiation factor 4A-I	EIF4A1	46.1246	350.256	25.12	7	8	9
P26641	Elongation factor 1-gamma	EEF1G	50.0871	349.921	16.48	9	9	10
Q9NVI7	ATPase family AAA domain-containing protein 3A	ATAD3A	71.3247	348.068	13.09	3	9	11
Q99873	Protein arginine N-methyltransferase 1	PRMT1	42.4339	340.413	17.52	6	6	7
Q96I25	Splicing factor 45	RBM17	44.9339	334.329	19.2	7	7	8
O15042	U2 snRNP-associated SURP motif-containing protein	U2SURP	118.219	333.03	8.55	7	7	8
P26599	Polypyrimidine tract-binding protein 1	PTBP1	57.1856	332.743	18.27	9	9	10
P31153	S-adenosylmethionine synthase isoform type-2	MAT2A	43.6333	328.925	21.52	7	7	9
P02538	Keratin, type II cytoskeletal 6A	KRT6A	60.0083	328.318	18.09	3	10	11
P26373	60S ribosomal protein L13	RPL13	24.2465	325.268	28.44	7	7	9
Q8TDY2	RB1-inducible coiled-coil protein 1	RB1CC1	182.975	318.21	6.02	8	8	8
P07910	Heterogeneous nuclear ribonucleoproteins C1/C2	HNRNPC	33.6495	317.06	22.22	7	7	7
Q00610	Clathrin heavy chain 1	CLTC	191.493	311.907	4.72	7	7	7
P46777	60S ribosomal protein L5	RPL5	34.3407	311.146	21.89	6	6	9
P62258	14-3-3 protein epsilon	YWHAE	29.1554	311.12	31.37	5	8	9
P39023	60S ribosomal protein L3	RPL3	46.0798	309.548	21.34	11	11	11
P62888	60S ribosomal protein L30	RPL30	12.7757	308.591	59.13	6	6	8
A6NHR9	Structural maintenance of chromosomes flexible hinge domain-containing protein 1	SMCHD1	226.231	308.17	5.69	9	9	9
P05141	ADP/ATP translocase 2	SLC25A5	32.8312	305.866	28.86	4	9	9
P38159	RNA-binding motif protein, X chromosome	RBMX	42.3063	305.783	18.41	7	7	8
P13647	Keratin, type II cytoskeletal 5	KRT5	62.34	302.086	16.27	4	10	11
P04406	Glyceraldehyde-3-phosphate dehydrogenase	GAPDH	36.0304	301.604	19.7	4	4	5
Q9BQG0	Myb-binding protein 1A	MYBBP1A	148.762	300.451	6.4	9	9	9
Q9NYJ8	TGF-beta-activated kinase 1 and MAP3K7-binding protein 2	TAB2	76.4466	300.28	10.25	5	5	5
Q13200	26S proteasome non-ATPase regulatory subunit 2	PSMD2	100.136	298.448	9.58	7	7	8
P50990	T-complex protein 1 subunit theta	CCT8	59.5825	296.279	15.88	8	8	8
O43795	Unconventional myosin-Ib	MYO1B	131.902	294.992	7.39	7	7	7
P47897	Glutamine--tRNA ligase	QARS	87.7429	294.646	11.48	8	8	8
Q15233	Non-POU domain-containing octamer-binding protein	NONO	54.1973	290.539	13.38	6	7	7
Q8IWI9	MAX gene-associated protein	MGA	331.631	289.989	2.88	6	6	6
P27635	60S ribosomal protein L10	RPL10	24.5879	289.959	23.83	5	5	7
Q16877	6-phosphofructo-2-kinase/fructose-2,6-bisphosphatase 4	PFKFB4	54.0053	289.696	17.91	4	9	10
Q9P2R3	Rabankyrin-5	ANKFY1	128.318	289.136	8.04	7	7	7
P02533	Keratin, type I cytoskeletal 14	KRT14	51.5294	287.245	18.86	3	7	7
P62917	60S ribosomal protein L8	RPL8	28.0073	286.26	29.96	9	9	10
P33992	DNA replication licensing factor MCM5	MCM5	82.2332	285.426	11.72	7	7	7
P15880	40S ribosomal protein S2	RPS2	31.3046	284.002	27.3	9	9	9
P18124	60S ribosomal protein L7	RPL7	29.2072	282.914	37.1	9	9	9
Q07020	60S ribosomal protein L18	RPL18	21.6211	282.719	27.66	5	5	6
Q13310	Polyadenylate-binding protein 4	PABPC4	70.7381	278.482	11.65	4	6	7
P12956	X-ray repair cross-complementing protein 6	XRCC6	69.7991	278.227	17.24	9	9	9
Q16629	Serine/arginine-rich splicing factor 7	SRSF7	27.35	277.383	28.57	6	7	10
P08238	Heat shock protein HSP 90-beta	HSP90AB1	83.2121	277.183	8.98	1	7	7
Q15084	Protein disulfide-isomerase A6	PDIA6	48.0913	269.404	12.73	4	4	4
P22087	rRNA 2'-O-methyltransferase fibrillarin	FBL	33.7634	264.324	24.92	6	6	7
P84098	60S ribosomal protein L19	RPL19	23.4512	262.392	22.96	5	5	6
P38919	Eukaryotic initiation factor 4A-III	EIF4A3	46.8412	260.72	19.46	5	6	7
P06748	Nucleophosmin	NPM1	32.5548	260.201	19.05	5	5	6
Q14498	RNA-binding protein 39	RBM39	59.3427	259.843	13.21	5	5	5
P07900	Heat shock protein HSP 90-alpha	HSP90AA1	84.6067	258.888	10.11	3	8	8
P35813	Protein phosphatase 1A	PPM1A	42.4207	256.404	12.83	1	4	6
P27348	14-3-3 protein theta	YWHAQ	27.7468	254.772	24.49	2	6	7
P12236	ADP/ATP translocase 3	SLC25A6	32.8452	254.687	25.5	3	8	8
P61313	60S ribosomal protein L15	RPL15	24.1311	252.987	28.43	8	8	8
Q8N5Z5	BTB/POZ domain-containing protein KCTD17	KCTD17	35.6475	248.924	15.89	3	4	5
P62906	60S ribosomal protein L10a	RPL10A	24.8155	248.47	23.04	4	4	8
P14868	Aspartate--tRNA ligase, cytoplasmic	DARS	57.1	246.222	20.36	9	9	9
A6NHL2	Tubulin alpha chain-like 3	TUBAL3	49.8767	245.57	10.31	1	4	6
P62269	40S ribosomal protein S18	RPS18	17.7079	241.549	40.13	7	7	7
P83731	60S ribosomal protein L24	RPL24	17.7679	241.19	35.03	6	6	7
Q5T9A4	ATPase family AAA domain-containing protein 3B	ATAD3B	72.5273	241.124	11.27	2	8	8
P30050	60S ribosomal protein L12	RPL12	17.8075	240.008	45.45	5	5	5
P17987	T-complex protein 1 subunit alpha	TCP1	60.3056	237.829	14.21	7	7	7
P32969	60S ribosomal protein L9	RPL9	21.8498	237.319	18.75	4	4	6
Q9Y6Y0	Influenza virus NS1A-binding protein	IVNS1ABP	71.6829	236.089	7.79	5	5	6
P62750	60S ribosomal protein L23a	RPL23A	17.6841	235.67	42.95	7	7	7
Q92598	Heat shock protein 105 kDa	HSPH1	96.8037	234.003	7.69	5	5	5
Q9UM54	Unconventional myosin-VI	MYO6	149.596	233.74	4.48	5	5	5
P14625	Endoplasmin	HSP90B1	92.4113	233.039	7.85	5	6	6
P16403	Histone H1.2	HIST1H1C	21.3517	232.13	27.23	6	6	7
Q9BS26	Endoplasmic reticulum resident protein 44	ERP44	46.9414	231.868	14.78	5	5	5
P49368	T-complex protein 1 subunit gamma	CCT3	60.4953	231.469	10.64	5	5	5
O00159	Unconventional myosin-Ic	MYO1C	121.606	231.362	6.3	5	5	5
O43390	Heterogeneous nuclear ribonucleoprotein R	HNRNPR	70.8993	230.389	11.53	3	7	7
Q8IWX8	Calcium homeostasis endoplasmic reticulum protein	CHERP	103.637	227.835	8.84	6	6	6
O75643	U5 small nuclear ribonucleoprotein 200 kDa helicase	SNRNP200	244.353	226.568	3.89	7	7	7
P19105	Myosin regulatory light chain 12A	MYL12A	19.7815	220.917	29.82	5	5	5
P62277	40S ribosomal protein S13	RPS13	17.2117	218.422	37.09	6	6	7
P51991	Heterogeneous nuclear ribonucleoprotein A3	HNRNPA3	39.5706	216.952	17.46	4	5	6
Q9Y265	RuvB-like 1	RUVBL1	50.1963	216.022	20.83	7	7	7
P61353	60S ribosomal protein L27	RPL27	15.7877	208.728	36.03	4	4	6
P46778	60S ribosomal protein L21	RPL21	18.5531	208.36	21.25	3	3	5
Q14103	Heterogeneous nuclear ribonucleoprotein D0	HNRNPD	38.4103	205.848	12.39	3	4	5
P13639	Elongation factor 2	EEF2	95.277	205.707	8.51	6	6	6
O75165	DnaJ homolog subfamily C member 13	DNAJC13	254.252	205.317	2.81	5	5	5
Q13162	Peroxiredoxin-4	PRDX4	30.5208	204.882	16.97	3	4	5
O60506	Heterogeneous nuclear ribonucleoprotein Q	SYNCRIP	69.5596	204.437	10.27	2	6	6
Q06830	Peroxiredoxin-1	PRDX1	22.0963	203.822	37.69	5	6	8
Q13151	Heterogeneous nuclear ribonucleoprotein A0	HNRNPA0	30.8218	203.335	22.95	4	5	7
Q13243	Serine/arginine-rich splicing factor 5	SRSF5	31.2453	202.174	15.44	3	4	5
P62280	40S ribosomal protein S11	RPS11	18.419	201.902	27.85	5	5	6
Q6N021	Methylcytosine dioxygenase TET2	TET2	223.671	201.401	4.3	7	7	7
Q99832	T-complex protein 1 subunit eta	CCT7	59.3289	201.344	12.34	5	5	5
P62913	60S ribosomal protein L11	RPL11	20.2396	200.024	24.16	4	4	5
Q14974	Importin subunit beta-1	KPNB1	97.108	199.016	5.48	4	4	4
P46781	40S ribosomal protein S9	RPS9	22.5776	197.188	29.38	6	6	6
O95232	Luc7-like protein 3	LUC7L3	51.4351	196.452	8.8	3	3	3
P08865	40S ribosomal protein SA	RPSA	32.8334	195.409	13.56	3	3	3
P31946	14-3-3 protein beta/alpha	YWHAB	28.0648	194.566	23.98	2	6	7
Q5JUX0	Spindlin-3	SPIN3	29.1887	194.095	23.64	2	5	6
Q8N163	Cell cycle and apoptosis regulator protein 2	CCAR2	102.838	191.688	8.02	6	6	6
P62244	40S ribosomal protein S15a	RPS15A	14.83	191.118	36.15	5	5	6
P14678	Small nuclear ribonucleoprotein-associated proteins B and B'	SNRPB	24.5937	191.018	16.25	5	5	6
P78527	DNA-dependent protein kinase catalytic subunit	PRKDC	468.788	190.769	1.74	7	7	7
P09661	U2 small nuclear ribonucleoprotein A'	SNRPA1	28.3981	190.704	21.96	5	5	5
P30041	Peroxiredoxin-6	PRDX6	25.0192	189.392	26.79	5	5	5
P31689	DnaJ homolog subfamily A member 1	DNAJA1	44.8395	189.3	15.62	6	6	6
P62805	Histone H4	HIST1H4A	11.3604	188.706	42.72	4	4	4
P40429	60S ribosomal protein L13a	RPL13A	23.5624	188.085	26.11	6	6	7
Q9Y2P8	RNA 3'-terminal phosphate cyclase-like protein	RCL1	40.8166	188.079	15.82	6	6	6
O14979	Heterogeneous nuclear ribonucleoprotein D-like	HNRNPDL	46.4091	188.03	8.1	2	3	4
P26368	Splicing factor U2AF 65 kDa subunit	U2AF2	53.4672	188.019	11.37	4	4	5
P62851	40S ribosomal protein S25	RPS25	13.7337	185.23	24	4	4	4
P82650	28S ribosomal protein S22, mitochondrial	MRPS22	41.2544	183.375	16.39	6	6	6
Q8NC51	Plasminogen activator inhibitor 1 RNA-binding protein	SERBP1	44.9385	183.062	10.29	3	3	4
P61981	14-3-3 protein gamma	YWHAG	28.2849	182.69	15.79	1	4	5
P16989	Y-box-binding protein 3	YBX3	40.066	182.612	17.2	2	4	4
P62195	26S proteasome regulatory subunit 8	PSMC5	45.5971	179.983	11.58	3	4	4
P63104	14-3-3 protein zeta/delta	YWHAZ	27.7277	179.915	18.78	1	5	6
P05023	Sodium/potassium-transporting ATPase subunit alpha-1	ATP1A1	112.824	179.869	4.2	3	3	3
P46779	60S ribosomal protein L28	RPL28	15.7377	178.766	26.28	5	5	5
Q9Y295	Developmentally-regulated GTP-binding protein 1	DRG1	40.5168	178.552	15.26	4	4	4
Q96N67	Dedicator of cytokinesis protein 7	DOCK7	242.407	178.162	3.04	6	6	6
Q8IX12	Cell division cycle and apoptosis regulator protein 1	CCAR1	132.739	178.101	4.87	6	6	6
P02768	Serum albumin	ALB	69.3215	177.838	3.94	3	3	4
P78371	T-complex protein 1 subunit beta	CCT2	57.4521	177.64	11.21	5	5	5
Q9BVP2	Guanine nucleotide-binding protein-like 3	GNL3	61.9545	176.993	8.56	5	5	5
P62316	Small nuclear ribonucleoprotein Sm D2	SNRPD2	13.5182	176.025	36.44	5	5	5
P50991	T-complex protein 1 subunit delta	CCT4	57.8878	175.554	9.83	5	5	5
P09874	Poly [ADP-ribose] polymerase 1	PARP1	113.012	175.236	4.54	4	4	4
P07237	Protein disulfide-isomerase	P4HB	57.0807	174.405	6.5	3	3	3
P50914	60S ribosomal protein L14	RPL14	23.417	174.096	18.6	4	4	5
Q09028	Histone-binding protein RBBP4	RBBP4	47.6261	173.831	8.24	3	3	3
Q01130	Serine/arginine-rich splicing factor 2	SRSF2	25.4612	173.336	21.72	4	4	4
P40227	T-complex protein 1 subunit zeta	CCT6A	57.9876	172.815	8.29	5	5	5
O75369	Filamin-B	FLNB	277.99	171.939	1.77	1	5	5
Q3V6T2	Girdin	CCDC88A	215.909	170.624	2.51	4	4	4
Q9NX58	Cell growth-regulating nucleolar protein	LYAR	43.5879	169.524	15.3	4	4	4
Q5UIP0	Telomere-associated protein RIF1	RIF1	274.294	169.499	1.78	4	4	4
P08579	U2 small nuclear ribonucleoprotein B''	SNRPB2	25.4701	169.158	16	4	4	4
Q15717	ELAV-like protein 1	ELAVL1	36.0692	168.702	13.19	4	4	4
P61254	60S ribosomal protein L26	RPL26	17.2475	167.889	35.86	6	6	6
P08779	Keratin, type I cytoskeletal 16	KRT16	51.2362	167.877	11.21	1	5	5
Q70IA6	MOB kinase activator 2	MOB2	26.9093	167.627	19.83	5	5	5
P51398	28S ribosomal protein S29, mitochondrial	DAP3	45.5376	166.814	13.07	4	4	4
P05387	60S acidic ribosomal protein P2	RPLP2	11.6578	165.236	55.65	3	4	4
P27708	CAD protein	CAD	242.829	164.123	2.07	4	4	4
P46783	40S ribosomal protein S10	RPS10	18.8859	163.364	18.18	3	3	4
P33993	DNA replication licensing factor MCM7	MCM7	81.2566	162.908	7.51	5	5	5
P21108	Ribose-phosphate pyrophosphokinase 3	PRPS1L1	34.817	161.742	15.41	4	4	4
Q04917	14-3-3 protein eta	YWHAH	28.201	161.158	14.23	1	4	5
Q9Y3I0	tRNA-splicing ligase RtcB homolog	RTCB	55.1749	161.128	11.49	5	5	5
P62829	60S ribosomal protein L23	RPL23	14.8561	160.163	25	2	2	3
Q6P2Q9	Pre-mRNA-processing-splicing factor 8	PRPF8	273.427	160.119	1.97	5	5	5
Q9H7D7	WD repeat-containing protein 26	WDR26	72.0787	159.758	5.45	4	4	4
P05787	Keratin, type II cytoskeletal 8	KRT8	53.6711	157.803	6	1	3	4
Q9Y3U8	60S ribosomal protein L36	RPL36	12.2459	157.758	28.57	3	3	4
P48643	T-complex protein 1 subunit epsilon	CCT5	59.6328	157.403	11.09	5	5	5
P54136	Arginine--tRNA ligase, cytoplasmic	RARS	75.3309	157.26	9.7	5	5	5
O00264	Membrane-associated progesterone receptor component 1	PGRMC1	21.6578	157.18	17.44	2	2	2
P12268	Inosine-5'-monophosphate dehydrogenase 2	IMPDH2	55.7696	156.243	8.75	3	3	3
Q13247	Serine/arginine-rich splicing factor 6	SRSF6	39.5634	155.468	8.72	2	3	3
P22061	Protein-L-isoaspartate(D-aspartate) O-methyltransferase	PCMT1	24.6206	155.207	17.18	3	3	3
P62263	40S ribosomal protein S14	RPS14	16.2625	155.046	29.8	3	3	4
P29692	Elongation factor 1-delta	EEF1D	31.1028	153.342	15.3	2	3	4
P41252	Isoleucine--tRNA ligase, cytoplasmic	IARS	144.406	153.247	3.72	5	5	5
P62847	40S ribosomal protein S24	RPS24	15.4134	152.146	25.56	3	3	4
Q2NL82	Pre-rRNA-processing protein TSR1 homolog	TSR1	91.7519	151.448	5.35	4	4	4
P69905	Hemoglobin subunit alpha	HBA1	15.2479	149.578	28.17	3	3	5
P39019	40S ribosomal protein S19	RPS19	16.0505	149.562	26.9	4	4	4
P12004	Proliferating cell nuclear antigen	PCNA	28.7503	147.948	18.39	4	4	4
Q49A26	Putative oxidoreductase GLYR1	GLYR1	60.518	146.565	7.59	3	3	4
Q9Y224	RNA transcription, translation and transport factor protein	RTRAF	28.0507	145.255	19.26	4	4	4
Q13242	Serine/arginine-rich splicing factor 9	SRSF9	25.5264	144.411	26.24	5	5	5
P62979	Ubiquitin-40S ribosomal protein S27a	RPS27A	17.9535	144.177	28.21	3	3	3
P23528	Cofilin-1	CFL1	18.4907	142.849	25.9	4	4	4
O95831	Apoptosis-inducing factor 1, mitochondrial	AIFM1	66.8589	140.792	5.87	3	3	3
O95816	BAG family molecular chaperone regulator 2	BAG2	23.7572	139.958	13.27	3	3	3
Q08378	Golgin subfamily A member 3	GOLGA3	167.252	138.784	3.94	4	4	4
Q8IUR7	Armadillo repeat-containing protein 8	ARMC8	75.4602	138.7	6.54	4	4	4
P24534	Elongation factor 1-beta	EEF1B2	24.7483	138.52	9.78	1	2	3
Q96S59	Ran-binding protein 9	RANBP9	77.798	138.169	3.16	2	2	2
P43243	Matrin-3	MATR3	94.5648	137.895	4.49	3	3	3
P45880	Voltage-dependent anion-selective channel protein 2	VDAC2	31.5465	137.719	13.95	4	4	4
Q9BQ67	Glutamate-rich WD repeat-containing protein 1	GRWD1	49.3882	137.568	6.95	2	2	3
P62333	26S proteasome regulatory subunit 10B	PSMC6	44.1451	135.8	10.28	3	3	3
Q8WXF1	Paraspeckle component 1	PSPC1	58.7062	135.207	9.37	3	3	3
P62249	40S ribosomal protein S16	RPS16	16.435	134.882	28.08	4	4	4
Q92499	ATP-dependent RNA helicase DDX1	DDX1	82.3798	134.082	4.05	3	3	3
P49207	60S ribosomal protein L34	RPL34	13.2845	133.564	28.21	4	4	4
P52907	F-actin-capping protein subunit alpha-1	CAPZA1	32.9023	130.201	16.08	3	3	3
P46087	Probable 28S rRNA (cytosine(4447)-C(5))-methyltransferase	NOP2	89.2471	129.856	5.67	4	4	4
P62826	GTP-binding nuclear protein Ran	RAN	24.4076	129.042	17.59	3	3	3
P36873	Serine/threonine-protein phosphatase PP1-gamma catalytic subunit	PPP1CC	36.9597	129.014	10.22	4	4	4
Q9P219	Protein Daple	CCDC88C	228.091	128.875	1.97	3	3	3
P54886	Delta-1-pyrroline-5-carboxylate synthase	ALDH18A1	87.2475	127.827	4.15	3	3	3
Q9Y399	28S ribosomal protein S2, mitochondrial	MRPS2	33.2281	127.291	9.8	3	3	3
P36542	ATP synthase subunit gamma, mitochondrial	ATP5F1C	32.9753	127.145	11.07	3	3	3
Q9NNW5	WD repeat-containing protein 6	WDR6	121.647	127.051	5.53	3	3	3
P56192	Methionine--tRNA ligase, cytoplasmic	MARS	101.052	126.429	4.44	3	3	3
P06753	Tropomyosin alpha-3 chain	TPM3	32.9298	126.391	13.33	4	4	4
P84103	Serine/arginine-rich splicing factor 3	SRSF3	19.3179	126.239	18.9	2	3	4
Q16531	DNA damage-binding protein 1	DDB1	126.887	124.26	3.77	4	4	4
Q15365	Poly(rC)-binding protein 1	PCBP1	37.4739	124.039	10.67	2	3	3
P01008	Antithrombin-III	SERPINC1	52.5689	123.974	5.82	3	3	3
Q15366	Poly(rC)-binding protein 2	PCBP2	38.5556	123.393	13.42	3	4	4
Q8ND56	Protein LSM14 homolog A	LSM14A	50.4991	123.101	7.13	3	3	3
Q9Y3D9	28S ribosomal protein S23, mitochondrial	MRPS23	21.7573	122.575	15.79	3	3	3
P23246	Splicing factor, proline- and glutamine-rich	SFPQ	76.1016	122.346	4.81	2	3	3
P62318	Small nuclear ribonucleoprotein Sm D3	SNRPD3	13.9073	121.638	31.75	3	3	3
P55209	Nucleosome assembly protein 1-like 1	NAP1L1	45.3459	121.222	6.91	2	2	3
Q9NYL9	Tropomodulin-3	TMOD3	39.5703	120.852	10.51	3	3	3
P16615	Sarcoplasmic/endoplasmic reticulum calcium ATPase 2	ATP2A2	114.683	120.704	2.5	2	2	2
P08621	U1 small nuclear ribonucleoprotein 70 kDa	SNRNP70	51.5258	120.155	10.3	3	3	3
Q9Y383	Putative RNA-binding protein Luc7-like 2	LUC7L2	46.4856	118.747	10.71	4	4	4
Q01081	Splicing factor U2AF 35 kDa subunit	U2AF1	27.8545	118.47	15.42	4	4	4
Q9H0A0	RNA cytidine acetyltransferase	NAT10	115.657	118.001	2.54	2	2	2
P50402	Emerin	EMD	28.9759	117.996	8.66	2	2	2
P62910	60S ribosomal protein L32	RPL32	15.8498	117.68	20	2	2	2
Q92665	28S ribosomal protein S31, mitochondrial	MRPS31	45.2905	117.629	10.13	3	3	3
Q9BRJ6	Uncharacterized protein C7orf50	C7orf50	22.0698	117.381	24.23	3	3	3
Q13263	Transcription intermediary factor 1-beta	TRIM28	88.4934	117.1	2.99	2	2	2
Q14152	Eukaryotic translation initiation factor 3 subunit A	EIF3A	166.468	117.088	2.46	3	3	3
P02649	Apolipoprotein E	APOE	36.1318	116.79	6.62	2	2	3
P46776	60S ribosomal protein L27a	RPL27A	16.551	116.725	22.3	3	3	3
Q93009	Ubiquitin carboxyl-terminal hydrolase 7	USP7	128.22	116.648	2.81	3	3	3
Q15428	Splicing factor 3A subunit 2	SF3A2	49.2243	116.207	9.05	3	3	3
Q02543	60S ribosomal protein L18a	RPL18A	20.7489	116.019	23.3	4	4	4
Q09161	Nuclear cap-binding protein subunit 1	NCBP1	91.7805	115.578	2.91	2	2	2
O15226	NF-kappa-B-repressing factor	NKRF	77.6242	115.195	2.61	2	2	2
P35998	26S proteasome regulatory subunit 7	PSMC2	48.6031	114.552	5.08	2	2	2
P46782	40S ribosomal protein S5	RPS5	22.8621	111.097	19.12	3	3	3
O75083	WD repeat-containing protein 1	WDR1	66.1519	111.019	8.58	3	3	3
Q13595	Transformer-2 protein homolog alpha	TRA2A	32.6691	110.929	8.16	2	2	2
Q9UHX1	Poly(U)-binding-splicing factor PUF60	PUF60	59.8376	110.055	14.13	4	4	4
O43242	26S proteasome non-ATPase regulatory subunit 3	PSMD3	60.9395	109.773	6.74	3	3	3
O76021	Ribosomal L1 domain-containing protein 1	RSL1D1	54.9389	108.338	9.59	4	4	4
P08708	40S ribosomal protein S17	RPS17	15.5404	108.278	14.81	3	3	3
P42766	60S ribosomal protein L35	RPL35	14.5426	107.141	24.39	3	3	3
P63010	AP-2 complex subunit beta	AP2B1	104.486	106.982	4.91	4	4	4
Q92769	Histone deacetylase 2	HDAC2	55.3288	106.557	6.15	2	2	2
Q15029	116 kDa U5 small nuclear ribonucleoprotein component	EFTUD2	109.366	106.424	3.6	3	3	3
Q96PK6	RNA-binding protein 14	RBM14	69.4489	106.3	1.79	1	1	1
P41250	Glycine--tRNA ligase	GARS	83.1126	105.026	3.52	2	2	2
Q14558	Phosphoribosyl pyrophosphate synthase-associated protein 1	PRPSAP1	39.3686	104.838	7.58	2	2	2
Q9UHB6	LIM domain and actin-binding protein 1	LIMA1	85.1734	104.253	4.48	3	3	3
P62873	Guanine nucleotide-binding protein G(I)/G(S)/G(T) subunit beta-1	GNB1	37.353	104.22	6.76	2	2	2
O43324	Eukaryotic translation elongation factor 1 epsilon-1	EEF1E1	19.7983	103.565	12.64	2	2	2
P62899	60S ribosomal protein L31	RPL31	14.4539	103.33	18.4	2	2	3
P62937	Peptidyl-prolyl cis-trans isomerase A	PPIA	18.0009	102.86	19.39	3	3	3
Q8N680	Zinc finger and BTB domain-containing protein 2	ZBTB2	57.3003	102.417	10.31	3	3	3
P52597	Heterogeneous nuclear ribonucleoprotein F	HNRNPF	45.6429	101.964	9.4	2	3	3
P30153	Serine/threonine-protein phosphatase 2A 65 kDa regulatory subunit A alpha isoform	PPP2R1A	65.2669	101.186	5.09	2	2	2
Q15008	26S proteasome non-ATPase regulatory subunit 6	PSMD6	45.5023	101.106	3.86	1	1	2
Q9HC36	rRNA methyltransferase 3, mitochondrial	MRM3	46.9904	100.585	6.9	2	2	3
Q02978	Mitochondrial 2-oxoglutarate/malate carrier protein	SLC25A11	34.0399	100.583	7.96	2	2	2
Q8NI27	THO complex subunit 2	THOC2	182.659	100.388	1.38	2	2	2
P35625	Metalloproteinase inhibitor 3	TIMP3	24.1288	100.13	18.96	4	4	4
O43290	U4/U6.U5 tri-snRNP-associated protein 1	SART1	90.2003	100.083	3.38	2	2	2
Q7Z2W4	Zinc finger CCCH-type antiviral protein 1	ZC3HAV1	101.367	100.06	1.66	1	1	1
O43684	Mitotic checkpoint protein BUB3	BUB3	37.1312	99.9287	9.76	3	3	3
Q96KK5	Histone H2A type 1-H	HIST1H2AH	13.8978	99.4047	21.88	2	2	2
P18621	60S ribosomal protein L17	RPL17	21.3833	99.2198	13.59	3	3	3
P47914	60S ribosomal protein L29	RPL29	17.7411	98.7763	14.47	2	2	2
Q15427	Splicing factor 3B subunit 4	SF3B4	44.3571	98.0607	5.19	2	2	2
Q07666	KH domain-containing, RNA-binding, signal transduction-associated protein 1	KHDRBS1	48.1972	97.8463	5.19	3	3	3
Q9UNM6	26S proteasome non-ATPase regulatory subunit 13	PSMD13	42.9181	97.3796	5.32	2	2	2
P84090	Enhancer of rudimentary homolog	ERH	12.251	97.2905	26.92	3	3	3
Q8NE71	ATP-binding cassette sub-family F member 1	ABCF1	95.8665	97.1373	2.72	2	2	2
P62995	Transformer-2 protein homolog beta	TRA2B	33.6456	97.0569	11.81	3	3	3
P62266	40S ribosomal protein S23	RPS23	15.7977	96.2198	13.99	2	2	2
Q15024	Exosome complex component RRP42	EXOSC7	31.8011	96.12	5.15	1	1	1
O43809	Cleavage and polyadenylation specificity factor subunit 5	NUDT21	26.2107	95.4343	13.66	3	3	3
A6NMY6	Putative annexin A2-like protein	ANXA2P2	38.6348	95.39	9.14	3	3	3
Q7L5Y9	Macrophage erythroblast attacher	MAEA	45.258	95.3105	7.58	3	3	3
Q13895	Bystin	BYSL	49.57	95.1024	5.03	2	2	2
Q7L9L4	MOB kinase activator 1B	MOB1B	25.0746	94.2202	13.89	3	3	3
P78347	General transcription factor II-I	GTF2I	112.346	94.2143	2.61	2	2	2
Q9Y3Y2	Chromatin target of PRMT1 protein	CHTOP	26.3803	93.9261	5.24	1	1	2
P09211	Glutathione S-transferase P	GSTP1	23.341	93.9075	18.1	3	3	3
Q9BXP5	Serrate RNA effector molecule homolog	SRRT	100.604	92.3241	2.74	3	3	3
Q86V81	THO complex subunit 4	ALYREF	26.8716	92.0945	8.17	2	2	2
P02765	Alpha-2-HS-glycoprotein	AHSG	39.2997	92.0873	5.18	2	2	2
Q92552	28S ribosomal protein S27, mitochondrial	MRPS27	47.5814	91.5909	7.73	3	3	3
Q9NVP1	ATP-dependent RNA helicase DDX18	DDX18	75.3594	91.1576	3.28	2	2	2
A0A075B6S2	Immunoglobulin kappa variable 2D-29	IGKV2D-29	13.1347	90.9469	16.67	2	2	2
O75832	26S proteasome non-ATPase regulatory subunit 10	PSMD10	24.4124	90.1195	13.27	2	2	2
P0C0L4	Complement C4-A	C4A	192.664	89.3861	1.32	2	2	2
P62854	40S ribosomal protein S26	RPS26	13.0071	89.3491	31.3	3	3	3
Q9Y5Q9	General transcription factor 3C polypeptide 3	GTF3C3	101.208	89.0319	3.05	2	2	2
Q9UJS0	Calcium-binding mitochondrial carrier protein Aralar2	SLC25A13	74.1286	88.4108	4.59	2	2	2
Q7RTV0	PHD finger-like domain-containing protein 5A	PHF5A	12.397	88.353	20	2	2	2
P60228	Eukaryotic translation initiation factor 3 subunit E	EIF3E	52.1874	88.3359	4.04	2	2	2
O94905	Erlin-2	ERLIN2	37.8155	87.2685	7.08	2	2	2
P62857	40S ribosomal protein S28	RPS28	7.8362	86.9	17.39	1	1	1
Q99714	3-hydroxyacyl-CoA dehydrogenase type-2	HSD17B10	26.9061	86.38	13.03	3	3	3
Q9UNF1	Melanoma-associated antigen D2	MAGED2	64.9144	86.358	2.97	2	2	2
Q99460	26S proteasome non-ATPase regulatory subunit 1	PSMD1	105.769	86.3424	4.2	2	2	2
Q9UHI6	Probable ATP-dependent RNA helicase DDX20	DDX20	92.1825	86.2033	2.91	2	2	2
P02647	Apolipoprotein A-I	APOA1	30.7589	86.01	5.99	1	1	1
Q86XN7	Proline and serine-rich protein 1	PROSER1	95.639	85.454	1.17	2	2	2
O60814	Histone H2B type 1-K	HIST1H2BK	13.8816	84.2709	27.78	3	3	3
O00268	Transcription initiation factor TFIID subunit 4	TAF4	110.047	84.2345	2.03	2	2	2
O75306	NADH dehydrogenase [ubiquinone] iron-sulfur protein 2, mitochondrial	NDUFS2	52.5117	84.16	2.59	1	1	1
P49902	Cytosolic purine 5'-nucleotidase	NT5C2	64.9283	84.0027	3.39	2	2	2
Q8NCE2	Myotubularin-related protein 14	MTMR14	72.1578	83.9167	2.77	2	2	2
P46821	Microtubule-associated protein 1B	MAP1B	270.468	83.5789	0.85	2	2	2
P22102	Trifunctional purine biosynthetic protein adenosine-3	GART	107.699	83.5337	2.48	2	2	2
O75494	Serine/arginine-rich splicing factor 10	SRSF10	31.2818	83.2009	8.78	2	2	2
P01344	Insulin-like growth factor II	IGF2	20.1273	83.02	8.89	1	1	1
P78362	SRSF protein kinase 2	SRPK2	77.4782	82.9507	3.05	1	2	2
O43175	D-3-phosphoglycerate dehydrogenase	PHGDH	56.6144	82.9484	3.19	2	2	2
Q96AV8	Transcription factor E2F7	E2F7	99.8265	82.3344	2.74	2	2	2
O43172	U4/U6 small nuclear ribonucleoprotein Prp4	PRPF4	58.4124	82.33	3.07	1	1	1
O43719	HIV Tat-specific factor 1	HTATSF1	85.8006	81.8916	2.38	2	2	2
Q7Z353	Highly divergent homeobox	HDX	77.1579	80.5682	2.9	2	2	2
P41091	Eukaryotic translation initiation factor 2 subunit 3	EIF2S3	51.0772	80.0628	6.36	2	2	2
O00425	Insulin-like growth factor 2 mRNA-binding protein 3	IGF2BP3	63.6656	79.9842	4.66	1	2	2
O00231	26S proteasome non-ATPase regulatory subunit 11	PSMD11	47.434	79.9556	5.92	2	2	2
Q14684	Ribosomal RNA processing protein 1 homolog B	RRP1B	84.3752	79.6365	2.9	2	2	2
P82930	28S ribosomal protein S34, mitochondrial	MRPS34	25.6345	79.4972	6.88	2	2	2
Q9NUL7	Probable ATP-dependent RNA helicase DDX28	DDX28	59.5445	79.4615	5	2	2	2
P48556	26S proteasome non-ATPase regulatory subunit 8	PSMD8	39.5868	79.0303	4.57	2	2	2
P33176	Kinesin-1 heavy chain	KIF5B	109.617	78.98	1.66	1	1	1
O75122	CLIP-associating protein 2	CLASP2	141.046	78.5683	1.93	2	2	2
Q15654	Thyroid receptor-interacting protein 6	TRIP6	50.2555	78.1025	9.66	3	3	3
Q8TDN6	Ribosome biogenesis protein BRX1 homolog	BRIX1	41.3749	77.6268	5.38	2	2	2
P00492	Hypoxanthine-guanine phosphoribosyltransferase	HPRT1	24.5636	76.8991	10.55	2	2	2
O00567	Nucleolar protein 56	NOP56	66.0087	76.7675	4.04	2	2	2
P17980	26S proteasome regulatory subunit 6A	PSMC3	49.1725	76.69	2.28	1	1	1
O14654	Insulin receptor substrate 4	IRS4	133.685	76.5359	1.51	2	2	2
Q9BU76	Multiple myeloma tumor-associated protein 2	MMTAG2	29.3939	76.51	5.32	1	1	1
P12270	Nucleoprotein TPR	TPR	267.131	76.01	0.42	1	1	1
Q8N684	Cleavage and polyadenylation specificity factor subunit 7	CPSF7	52.0183	75.9144	4.46	2	2	2
Q96DG6	Carboxymethylenebutenolidase homolog	CMBL	28.0302	75.6154	7.76	2	2	2
Q96EY7	Pentatricopeptide repeat domain-containing protein 3, mitochondrial	PTCD3	78.4997	75.3903	3.05	2	2	2
P48444	Coatomer subunit delta	ARCN1	57.1741	74.88	2.35	1	1	1
Q9NQT5	Exosome complex component RRP40	EXOSC3	29.5534	74.5708	8	2	2	2
P10644	cAMP-dependent protein kinase type I-alpha regulatory subunit	PRKAR1A	42.955	74.56	4.46	1	1	1
Q5W0B1	RING finger protein 219	RNF219	81.0657	74.52	2.34	1	1	1
Q86YZ3	Hornerin	HRNR	282.228	74.2273	3.12	3	3	3
Q9NQ55	Suppressor of SWI4 1 homolog	PPAN	53.1608	74.04	2.11	1	1	1
Q9P035	Very-long-chain (3R)-3-hydroxyacyl-CoA dehydratase 3	HACD3	43.1316	73.84	3.87	1	1	1
Q9BQ39	ATP-dependent RNA helicase DDX50	DDX50	82.5141	73.7089	3.53	1	2	2
Q9UMS4	Pre-mRNA-processing factor 19	PRPF19	55.1463	73.6087	5.56	2	2	2
Q16630	Cleavage and polyadenylation specificity factor subunit 6	CPSF6	59.1734	73.46	2.36	1	1	1
P61160	Actin-related protein 2	ACTR2	44.7322	73.1676	6.35	2	2	2
Q52LJ0	Protein FAM98B	FAM98B	37.167	72.7	3.94	1	1	1
P06493	Cyclin-dependent kinase 1	CDK1	34.0739	72.1333	8.08	2	2	2
Q13573	SNW domain-containing protein 1	SNW1	61.4565	72.12	2.8	1	1	1
Q9H0D6	5'-3' exoribonuclease 2	XRN2	108.513	71.9863	2.11	2	2	2
P09543	2',3'-cyclic-nucleotide 3'-phosphodiesterase	CNP	47.5487	71.9857	5.7	3	3	3
O60884	DnaJ homolog subfamily A member 2	DNAJA2	45.7166	71.98	3.16	1	1	1
Q9H871	Protein RMD5 homolog A	RMND5A	43.9642	71.8934	5.63	2	2	2
Q6VN20	Ran-binding protein 10	RANBP10	67.2143	71.79	1.61	1	1	1
P62191	26S proteasome regulatory subunit 4	PSMC1	49.1537	71.4761	5.45	1	2	2
Q13642	Four and a half LIM domains protein 1	FHL1	36.2386	70.9856	6.19	2	2	2
P05455	Lupus La protein	SSB	46.8082	70.4821	4.9	2	2	2
O75385	Serine/threonine-protein kinase ULK1	ULK1	112.56	70.16	1.24	1	1	1
O00308	NEDD4-like E3 ubiquitin-protein ligase WWP2	WWP2	98.8501	70.08	1.38	1	1	1
P08195	4F2 cell-surface antigen heavy chain	SLC3A2	67.9517	69.83	2.22	1	1	1
Q9P1Y5	Calmodulin-regulated spectrin-associated protein 3	CAMSAP3	134.666	69.8286	2.96	2	2	2
P22234	Multifunctional protein ADE2	PAICS	47.0491	69.6244	4.94	2	2	2
P13796	Plastin-2	LCP1	70.2439	69.1135	3.51	2	2	2
P18065	Insulin-like growth factor-binding protein 2	IGFBP2	34.7912	68.99	4	1	1	1
Q9NY12	H/ACA ribonucleoprotein complex subunit 1	GAR1	22.3342	68.8827	13.36	2	2	2
Q96J01	THO complex subunit 3	THOC3	38.7468	68.74	2.85	1	1	1
Q5RKV6	Exosome complex component MTR3	EXOSC6	28.2177	68.5983	7.35	2	2	2
P42285	Exosome RNA helicase MTR4	MTREX	117.729	68.4764	1.82	2	2	2
Q01844	RNA-binding protein EWS	EWSR1	68.4357	68.3043	5.03	2	2	2
Q9BZF1	Oxysterol-binding protein-related protein 8	OSBPL8	101.132	68.02	1.24	1	1	1
Q96SB4	SRSF protein kinase 1	SRPK1	74.2784	67.938	2.44	1	2	2
P11488	Guanine nucleotide-binding protein G(t) subunit alpha-1	GNAT1	40.015	67.54	3.14	1	1	1
Q4G0J3	La-related protein 7	LARP7	66.8574	67.3945	4.12	2	2	2
Q04837	Single-stranded DNA-binding protein, mitochondrial	SSBP1	17.249	67.0167	16.22	2	2	2
Q12769	Nuclear pore complex protein Nup160	NUP160	162.017	66.99	0.91	1	1	1
P05386	60S acidic ribosomal protein P1	RPLP1	11.5067	66.9503	28.95	1	2	2
P15153	Ras-related C3 botulinum toxin substrate 2	RAC2	21.4151	66.75	5.21	1	1	1
Q00341	Vigilin	HDLBP	141.368	66.6433	1.58	2	2	2
P63208	S-phase kinase-associated protein 1	SKP1	18.6462	66.6342	12.88	2	2	2
P61964	WD repeat-containing protein 5	WDR5	36.5655	66.45	4.19	1	1	1
P62081	40S ribosomal protein S7	RPS7	22.1133	66.2847	9.79	2	2	2
P07305	Histone H1.0	H1F0	20.8502	66.1624	11.86	2	2	2
O94915	Protein furry homolog-like	FRYL	339.383	65.061	0.76	2	2	2
O00232	26S proteasome non-ATPase regulatory subunit 12	PSMD12	52.8706	64.91	2.19	1	1	1
Q9BUJ2	Heterogeneous nuclear ribonucleoprotein U-like protein 1	HNRNPUL1	95.6793	64.79	1.75	1	1	1
O43615	Mitochondrial import inner membrane translocase subunit TIM44	TIMM44	51.3235	64.62	2.43	1	1	1
O00560	Syntenin-1	SDCBP	32.4239	64.5838	9.4	2	2	2
Q13045	Protein flightless-1 homolog	FLII	144.66	64.54	0.79	1	1	1
Q01780	Exosome component 10	EXOSC10	100.768	64.13	1.13	1	1	1
P28288	ATP-binding cassette sub-family D member 3	ABCD3	75.4276	64.11	2.12	1	1	1
Q86U86	Protein polybromo-1	PBRM1	192.825	63.9451	1.54	2	2	2
Q9Y3B4	Splicing factor 3B subunit 6	SF3B6	14.5756	63.64	9.6	1	1	1
Q9Y2R9	28S ribosomal protein S7, mitochondrial	MRPS7	28.116	63.3497	9.09	2	2	2
P35268	60S ribosomal protein L22	RPL22	14.7778	62.78	10.16	1	1	1
Q969R5	Lethal(3)malignant brain tumor-like protein 2	L3MBTL2	79.0595	62.69	1.84	1	1	1
Q9NPD3	Exosome complex component RRP41	EXOSC4	26.3665	62.2	4.9	1	1	1
O00487	26S proteasome non-ATPase regulatory subunit 14	PSMD14	34.5546	62.14	4.19	1	1	1
Q9H7E9	UPF0488 protein C8orf33	C8orf33	24.9769	61.13	6.99	1	1	1
Q9H2U1	ATP-dependent RNA helicase DHX36	DHX36	114.688	60.85	0.99	1	1	1
Q5BKZ1	DBIRD complex subunit ZNF326	ZNF326	65.6131	60.81	2.75	1	1	1
Q9HAV4	Exportin-5	XPO5	136.222	60.76	0.83	1	1	1
Q8IY81	pre-rRNA processing protein FTSJ3	FTSJ3	96.4992	60.58	1.89	1	1	1
Q8IY37	Probable ATP-dependent RNA helicase DHX37	DHX37	129.464	60.5028	1.64	2	2	2
Q15046	Lysine--tRNA ligase	KARS	68.0046	60.2162	3.35	2	2	2
O15084	Serine/threonine-protein phosphatase 6 regulatory ankyrin repeat subunit A	ANKRD28	112.894	60.01	0.85	1	1	1
Q12904	Aminoacyl tRNA synthase complex-interacting multifunctional protein 1	AIMP1	34.3311	59.96	3.85	1	1	1
O95793	Double-stranded RNA-binding protein Staufen homolog 1	STAU1	63.1428	59.92	2.77	1	1	1
P22694	cAMP-dependent protein kinase catalytic subunit beta	PRKACB	40.597	59.78	3.42	1	1	1
Q8IWS0	PHD finger protein 6	PHF6	41.264	59.7448	6.85	2	2	2
O00148	ATP-dependent RNA helicase DDX39A	DDX39A	49.098	59.3171	2.34	1	1	2
Q8N9T8	Protein KRI1 homolog	KRI1	82.5475	58.93	1.99	1	1	1
O15371	Eukaryotic translation initiation factor 3 subunit D	EIF3D	63.9324	58.84	2.19	1	1	1
O94776	Metastasis-associated protein MTA2	MTA2	74.9757	58.424	3.59	2	2	2
Q9BRP1	Programmed cell death protein 2-like	PDCD2L	39.3912	58.16	3.35	1	1	1
P35249	Replication factor C subunit 4	RFC4	39.6569	57.81	2.48	1	1	1
Q99613	Eukaryotic translation initiation factor 3 subunit C	EIF3C	105.278	57.79	1.1	1	1	1
P24752	Acetyl-CoA acetyltransferase, mitochondrial	ACAT1	45.1706	57.72	4.22	1	1	1
Q12792	Twinfilin-1	TWF1	40.2577	57.54	3.71	1	1	1
Q01804	OTU domain-containing protein 4	OTUD4	123.968	57.27	1.44	1	1	1
O75461	Transcription factor E2F6	E2F6	31.8245	57.08	5.69	1	1	1
Q9Y277	Voltage-dependent anion-selective channel protein 3	VDAC3	30.6393	56.98	4.59	1	1	1
Q92945	Far upstream element-binding protein 2	KHSRP	73.07	56.77	1.41	1	1	1
Q96B26	Exosome complex component RRP43	EXOSC8	30.0203	56.71	3.99	1	1	1
Q9NXF1	Testis-expressed protein 10	TEX10	105.608	56.43	1.4	1	1	1
P02042	Hemoglobin subunit delta	HBD	16.0453	56.4	6.8	1	1	1
Q9BXJ4	Complement C1q tumor necrosis factor-related protein 3	C1QTNF3	26.9768	56.29	4.47	1	1	1
P53007	Tricarboxylate transport protein, mitochondrial	SLC25A1	33.991	56.2163	7.4	2	2	2
Q9Y676	28S ribosomal protein S18b, mitochondrial	MRPS18B	29.377	56.1054	12.4	2	2	2
P62841	40S ribosomal protein S15	RPS15	17.0292	55.88	6.9	1	1	1
P62314	Small nuclear ribonucleoprotein Sm D1	SNRPD1	13.2734	55.68	10.92	1	1	1
P31151	Protein S100-A7	S100A7	11.4636	55.59	11.88	1	1	1
P25685	DnaJ homolog subfamily B member 1	DNAJB1	38.0204	55.54	2.94	1	1	1
Q8WU90	Zinc finger CCCH domain-containing protein 15	ZC3H15	48.5726	55.3877	7.28	2	2	2
P50454	Serpin H1	SERPINH1	46.4112	55.36	3.11	1	1	1
Q9Y285	Phenylalanine--tRNA ligase alpha subunit	FARSA	57.5275	55.34	2.17	1	1	1
O75821	Eukaryotic translation initiation factor 3 subunit G	EIF3G	35.5889	55.32	2.81	1	1	1
Q9NX63	MICOS complex subunit MIC19	CHCHD3	26.1362	55.09	3.96	1	1	1
Q99615	DnaJ homolog subfamily C member 7	DNAJC7	56.4047	54.82	2.02	1	1	1
Q659C4	La-related protein 1B	LARP1B	105.257	54.62	1.53	1	1	1
Q99575	Ribonucleases P/MRP protein subunit POP1	POP1	114.636	54.57	1.07	1	1	1
Q6P158	Putative ATP-dependent RNA helicase DHX57	DHX57	155.507	54.44	0.58	1	1	1
P08567	Pleckstrin	PLEK	40.0994	54.37	4	1	1	1
P09001	39S ribosomal protein L3, mitochondrial	MRPL3	38.6081	54.15	2.01	1	1	1
Q9P258	Protein RCC2	RCC2	56.0492	54.06	2.11	1	1	1
Q92522	Histone H1x	H1FX	22.4735	53.67	4.69	1	1	1
Q96EY4	Translation machinery-associated protein 16	TMA16	23.8494	53.64	3.45	1	1	1
P04181	Ornithine aminotransferase, mitochondrial	OAT	48.5042	53.5191	3.87	2	2	2
Q96DV4	39S ribosomal protein L38, mitochondrial	MRPL38	44.5684	53.05	1.84	1	1	1
Q14669	E3 ubiquitin-protein ligase TRIP12	TRIP12	220.296	52.95	0.75	1	1	1
Q9BUB7	Transmembrane protein 70, mitochondrial	TMEM70	28.9509	52.88	4.62	1	1	1
Q86SE5	RNA-binding Raly-like protein	RALYL	32.3106	52.86	4.12	1	1	1
P62861	40S ribosomal protein S30	FAU	6.64382	52.63	16.95	1	1	1
O00411	DNA-directed RNA polymerase, mitochondrial	POLRMT	138.532	52.4149	1.46	2	2	2
Q9Y6V7	Probable ATP-dependent RNA helicase DDX49	DDX49	54.192	52.06	2.28	1	1	1
P11177	Pyruvate dehydrogenase E1 component subunit beta, mitochondrial	PDHB	39.208	52.05	2.23	1	1	1
O75131	Copine-3	CPNE3	60.0921	51.87	1.68	1	1	1
P37108	Signal recognition particle 14 kDa protein	SRP14	14.5608	51.78	5.88	1	1	1
Q13418	Integrin-linked protein kinase	ILK	51.3859	51.78	2.21	1	1	1
P19387	DNA-directed RNA polymerase II subunit RPB3	POLR2C	31.4217	51.62	5.09	1	1	1
O43670	BUB3-interacting and GLEBS motif-containing protein ZNF207	ZNF207	50.7171	51.47	4.18	1	1	1
P60866	40S ribosomal protein S20	RPS20	13.3643	51.11	9.24	1	1	1
P82933	28S ribosomal protein S9, mitochondrial	MRPS9	45.8058	50.88	3.28	1	1	1
P11387	DNA topoisomerase 1	TOP1	90.6689	50.8	2.09	1	1	1
Q9UN37	Vacuolar protein sorting-associated protein 4A	VPS4A	48.867	50.68	2.75	1	1	1
Q14739	Lamin-B receptor	LBR	70.658	50.1	1.79	1	1	1
Q13330	Metastasis-associated protein MTA1	MTA1	80.7353	49.99	1.68	1	1	1
P20042	Eukaryotic translation initiation factor 2 subunit 2	EIF2S2	38.3644	49.83	2.7	1	1	1
O75534	Cold shock domain-containing protein E1	CSDE1	88.8289	49.72	1	1	1	1
P35659	Protein DEK	DEK	42.6479	49.66	3.2	1	1	1
P51532	Transcription activator BRG1	SMARCA4	184.53	49.55	0.67	1	1	1
Q96CU9	FAD-dependent oxidoreductase domain-containing protein 1	FOXRED1	53.7777	49.43	2.67	1	1	1
P61026	Ras-related protein Rab-10	RAB10	22.5266	49.35	5.5	1	1	1
Q9UQ35	Serine/arginine repetitive matrix protein 2	SRRM2	299.438	49.32	0.51	1	1	1
P43686	26S proteasome regulatory subunit 6B	PSMC4	47.3365	49.04	2.15	1	1	1
Q9Y2Q9	28S ribosomal protein S28, mitochondrial	MRPS28	20.8298	48.7	5.35	1	1	1
P09234	U1 small nuclear ribonucleoprotein C	SNRPC	17.3812	47.88	7.55	1	1	1
O95104	Splicing factor, arginine/serine-rich 15	SCAF4	125.79	47.84	1.05	1	1	1
Q5SSJ5	Heterochromatin protein 1-binding protein 3	HP1BP3	61.1693	47.81	1.99	1	1	1
Q9BTD8	RNA-binding protein 42	RBM42	50.382	47.67	1.25	1	1	1
Q99848	Probable rRNA-processing protein EBP2	EBNA1BP2	34.8304	47.28	3.27	1	1	1
P36955	Pigment epithelium-derived factor	SERPINF1	46.2833	47.15	1.67	1	1	1
P82675	28S ribosomal protein S5, mitochondrial	MRPS5	47.9761	46.89	3.26	1	1	1
Q92900	Regulator of nonsense transcripts 1	UPF1	124.267	46.77	0.97	1	1	1
P55786	Puromycin-sensitive aminopeptidase	NPEPPS	103.211	46.72	1.41	1	1	1
Q9Y6A4	Cilia- and flagella-associated protein 20	CFAP20	22.76	46.52	6.22	1	1	1
P07996	Thrombospondin-1	THBS1	129.3	46.12	1.03	1	1	1
O94906	Pre-mRNA-processing factor 6	PRPF6	106.858	45.98	0.96	1	1	1
Q00325	Phosphate carrier protein, mitochondrial	SLC25A3	40.0687	45.77	2.21	1	1	1
Q12789	General transcription factor 3C polypeptide 1	GTF3C1	238.725	45.74	0.47	1	1	1
Q9UKF6	Cleavage and polyadenylation specificity factor subunit 3	CPSF3	77.4362	45.49	1.46	1	1	1
P82673	28S ribosomal protein S35, mitochondrial	MRPS35	36.8211	45.37	3.1	1	1	1
O76041	Nebulette	NEBL	116.381	45.16	1.58	1	1	1
Q9Y2S7	Polymerase delta-interacting protein 2	POLDIP2	42.0072	44.55	2.72	1	1	1
P08243	Asparagine synthetase [glutamine-hydrolyzing]	ASNS	64.3286	44.47	1.6	1	1	1
Q14008	Cytoskeleton-associated protein 5	CKAP5	225.352	44.45	0.69	1	1	1
O15397	Importin-8	IPO8	119.861	43.99	0.96	1	1	1
P30711	Glutathione S-transferase theta-1	GSTT1	27.3176	43.82	2.5	1	1	1
Q8WTT2	Nucleolar complex protein 3 homolog	NOC3L	92.4896	43.79	1.63	1	1	1
Q9BV86	N-terminal Xaa-Pro-Lys N-methyltransferase 1	NTMT1	25.3708	43.73	3.14	1	1	1
Q13395	Probable methyltransferase TARBP1	TARBP1	181.559	43.6	0.74	1	1	1
P38432	Coilin	COIL	62.5699	43.45	1.74	1	1	1
Q9Y4C8	Probable RNA-binding protein 19	RBM19	107.265	43.43	0.73	1	1	1
Q6NXT2	Histone H3.3C	H3F3C	15.2044	43.12	5.19	1	1	1
O75940	Survival of motor neuron-related-splicing factor 30	SMNDC1	26.6945	43.03	5.04	1	1	1
A6NIZ1	Ras-related protein Rap-1b-like protein	---	20.9116	42.96	5.43	1	1	1
Q9BWU0	Kanadaptin	SLC4A1AP	88.759	42.85	1.13	1	1	1
P17812	CTP synthase 1	CTPS1	66.648	42.57	2.03	1	1	1
P63151	Serine/threonine-protein phosphatase 2A 55 kDa regulatory subunit B alpha isoform	PPP2R2A	51.6595	42.45	2.68	1	1	1
P57678	Gem-associated protein 4	GEMIN4	119.96	42.37	1.13	1	1	1
Q9P2J5	Leucine--tRNA ligase, cytoplasmic	LARS	134.379	42.35	1.19	1	1	1
P81605	Dermcidin	DCD	11.2768	42.25	10	1	1	1
Q99496	E3 ubiquitin-protein ligase RING2	RNF2	37.6316	42.2	4.17	1	1	1
Q15185	Prostaglandin E synthase 3	PTGES3	18.6854	42.19	10.63	1	1	1
O75400	Pre-mRNA-processing factor 40 homolog A	PRPF40A	108.737	41.91	0.94	1	1	1
O00505	Importin subunit alpha-4	KPNA3	57.7748	41.74	1.73	1	1	1
Q9HD64	X antigen family member 1	XAGE1A	9.07188	41.71	7.41	1	1	1
O00391	Sulfhydryl oxidase 1	QSOX1	82.5255	41.56	1.74	1	1	1
P63244	Receptor of activated protein C kinase 1	RACK1	35.0546	41.52	5.05	1	1	1
P49760	Dual specificity protein kinase CLK2	CLK2	60.053	41.44	2.81	1	1	1
Q16186	Proteasomal ubiquitin receptor ADRM1	ADRM1	42.1268	41.31	3.93	1	1	1
P60660	Myosin light polypeptide 6	MYL6	16.9191	41.23	8.61	1	1	1
O60841	Eukaryotic translation initiation factor 5B	EIF5B	138.742	41.19	0.98	1	1	1
Q07065	Cytoskeleton-associated protein 4	CKAP4	65.9827	41.19	1.5	1	1	1
Q9BT67	NEDD4 family-interacting protein 1	NDFIP1	24.8834	40.98	4.98	1	1	1
P55084	Trifunctional enzyme subunit beta, mitochondrial	HADHB	51.2615	40.92	2.32	1	1	1
P32119	Peroxiredoxin-2	PRDX2	21.8782	40.9	9.09	1	1	1
P15924	Desmoplakin	DSP	331.569	40.83	0.35	1	1	1
Q9UKA4	A-kinase anchor protein 11	AKAP11	210.38	40.58	0.63	1	1	1
Q9Y230	RuvB-like 2	RUVBL2	51.1246	40.47	2.16	1	1	1
Q8NHQ1	Centrosomal protein of 70 kDa	CEP70	69.7079	40.44	1.17	1	1	1
P00488	Coagulation factor XIII A chain	F13A1	83.2146	40.38	2.19	1	1	1
Q8N5C8	TGF-beta-activated kinase 1 and MAP3K7-binding protein 3	TAB3	78.6036	40.18	2.81	1	1	1
P18077	60S ribosomal protein L35a	RPL35A	12.5298	39.95	6.36	1	1	1
Q9Y3B9	RRP15-like protein	RRP15	31.4645	39.95	3.9	1	1	1
P02774	Vitamin D-binding protein	GC	52.929	39.95	1.69	1	1	1
Q9UNQ2	Probable dimethyladenosine transferase	DIMT1	35.2141	39.71	3.51	1	1	1
Q7L0Y3	tRNA methyltransferase 10 homolog C	TRMT10C	47.3166	39.7	2.73	1	1	1
Q15637	Splicing factor 1	SF1	68.2859	39.66	2.5	1	1	1
P11171	Protein 4.1	EPB41	96.9573	39.62	0.81	1	1	1
P62714	Serine/threonine-protein phosphatase 2A catalytic subunit beta isoform	PPP2CB	35.5523	39.54	3.56	1	1	1
P83881	60S ribosomal protein L36a	RPL36A	12.4328	39.53	8.49	1	1	1
Q6UB35	Monofunctional C1-tetrahydrofolate synthase, mitochondrial	MTHFD1L	105.724	39.47	1.53	1	1	1
P39060	Collagen alpha-1(XVIII) chain	COL18A1	178.077	39.26	0.51	1	1	1
P43307	Translocon-associated protein subunit alpha	SSR1	32.2153	39.22	2.8	1	1	1
Q9H0S4	Probable ATP-dependent RNA helicase DDX47	DDX47	50.6147	39.18	2.86	1	1	1
O75616	GTPase Era, mitochondrial	ERAL1	48.3195	38.87	3.89	1	1	1
P23142	Fibulin-1	FBLN1	77.1624	38.84	1.71	1	1	1
P40939	Trifunctional enzyme subunit alpha, mitochondrial	HADHA	82.9469	38.77	1.18	1	1	1
Q9NZT1	Calmodulin-like protein 5	CALML5	15.8828	38.73	5.48	1	1	1
Q10570	Cleavage and polyadenylation specificity factor subunit 1	CPSF1	160.782	38.71	0.76	1	1	1
Q6X4W1	NMDA receptor synaptonuclear signaling and neuronal migration factor	NSMF	60.1054	38.47	1.13	1	1	1
P56182	Ribosomal RNA processing protein 1 homolog A	RRP1	52.8066	38.41	1.95	1	1	1
Q5SNV9	Uncharacterized protein C1orf167	C1orf167	162.321	38.36	0.54	1	1	1
P21912	Succinate dehydrogenase [ubiquinone] iron-sulfur subunit, mitochondrial	SDHB	31.6088	38.25	3.21	1	1	1
O00154	Cytosolic acyl coenzyme A thioester hydrolase	ACOT7	41.7693	38.03	2.89	1	1	1
P54105	Methylosome subunit pICln	CLNS1A	26.1989	38.03	5.49	1	1	1
P51610	Host cell factor 1	HCFC1	208.602	37.99	0.84	1	1	1
Q8WX92	Negative elongation factor B	NELFB	65.6554	37.96	1.72	1	1	1
A6NKT7	RanBP2-like and GRIP domain-containing protein 3	RGPD3	197.364	37.86	0.74	1	1	1
Q9Y4E8	Ubiquitin carboxyl-terminal hydrolase 15	USP15	112.348	37.8	0.82	1	1	1
O95425	Supervillin	SVIL	247.593	37.56	0.5	1	1	1
Q9Y3F4	Serine-threonine kinase receptor-associated protein	STRAP	38.414	37.54	3.14	1	1	1
Q8TDD1	ATP-dependent RNA helicase DDX54	DDX54	98.5342	37.27	0.79	1	1	1
O43432	Eukaryotic translation initiation factor 4 gamma 3	EIF4G3	176.542	37.21	0.44	1	1	1
Q14444	Caprin-1	CAPRIN1	78.318	37.07	0.99	1	1	1
Q9NQ92	Coordinator of PRMT5 and differentiation stimulator	COPRS	20.0539	37.03	6.52	1	1	1
Q6ZUX3	TOG array regulator of axonemal microtubules protein 2	TOGARAM2	111.084	36.95	0.69	1	1	1
P51665	26S proteasome non-ATPase regulatory subunit 7	PSMD7	37.0025	36.45	2.16	1	1	1
Q9UKV3	Apoptotic chromatin condensation inducer in the nucleus	ACIN1	151.771	35.89	1.19	1	1	1
P49756	RNA-binding protein 25	RBM25	100.124	35.78	1.42	1	1	1
Q9Y2R5	28S ribosomal protein S17, mitochondrial	MRPS17	14.4929	35.4	6.92	1	1	1
Q9BPX5	Actin-related protein 2/3 complex subunit 5-like protein	ARPC5L	16.9308	34.97	7.84	1	1	1
P10515	Dihydrolipoyllysine-residue acetyltransferase component of pyruvate dehydrogenase complex, mitochondrial	DLAT	68.9531	34.78	1.24	1	1	1
Q9HB71	Calcyclin-binding protein	CACYBP	26.1936	34.29	3.07	1	1	1
Q8IV63	Inactive serine/threonine-protein kinase VRK3	VRK3	52.8477	34.1	1.9	1	1	1
P17612	cAMP-dependent protein kinase catalytic subunit alpha	PRKACA	40.564	34	3.42	1	1	1
P32926	Desmoglein-3	DSG3	107.465	33.42	0.7	1	1	1
A5YKK6	CCR4-NOT transcription complex subunit 1	CNOT1	266.768	33.21	0.46	1	1	1
Q96JJ3	Engulfment and cell motility protein 2	ELMO2	82.5623	32.88	1.39	1	1	1
P62633	Cellular nucleic acid-binding protein	CNBP	19.4496	31.66	4.52	1	1	1
Q5VW38	Protein GPR107	GPR107	66.9479	30.35	1.17	1	1	1
Q13347	Eukaryotic translation initiation factor 3 subunit I	EIF3I	36.4786	30.25	3.69	1	1	1
Q9UNE7	E3 ubiquitin-protein ligase CHIP	STUB1	34.8342	27.58	3.96	1	1	1
O43395	U4/U6 small nuclear ribonucleoprotein Prp3	PRPF3	77.4809	26.47	1.02	1	1	1

## Sheet: Sheet1
Binding protein	Sequence coverage (%)	Peptides
TBX3	0.3055	20
USP15	0.0082	1
