# Supplementary material for: Proteostatic reactivation of the developmental transcription factor TBX3 drives BRAF/MAPK-mediated tumorigenesis
Source: Nat Commun. 2024 May 15;15:4108. doi: 10.1038/s41467-024-48173-9 (PMC11096176; doi:10.1038/s41467-024-48173-9)
Supplement: Supplementary file 5 — Supplementary Data 2 [file 41467_2024_48173_MOESM5_ESM.xlsx]

## Sheet: Supplementary Data 1
Supplementary Data 1: List of Primers
shRNA
Name	5'-3' Sense
shUSP15#1	CCCATTGATAACTCTGGACTT
shUSP15#2	ATGTTGTAACTCGAAGATTTA
qRT-PCR
Human gene	Sequence
hTBX3-F	TTTGAAGACCATGGAGCCCG
hTBX3-R	ACATTCGCCTTCCCGACTTG
hp21CIP-F	AGGTGGACCTGGAGACTCTCAG
hp21CIP-R	TCCTCTTGGAGAAGATCAGCCG
hp57KIP2- F	AGATCAGCGCCTGAGAAGTCGT
hp57KIP2-R	TCGGGGCTCTTTGGGCTCTAAA
hCCND1-F	TCTACACCGACAACTCCATCCG
hCCNDI-R	TCTGGCATTTTGGAGAGGAAGTG
hUSP15-F	CCCTACACTGCTGTAAGGACCA
hUSP15-R	GAGGGAAGTTCTTGATCCTGGC
hNIS-F	GTCTTTGCCCTCATGCTCCT
hNIS-R	CCACGACCTGGAACACATCA
hGAPDH-F	GTCTCCTCTGACTTCAACAGCG
hGAPDH-R	ACCACCCTGTTGCTGTAGCCAA
Mouse gene	Sequence
mTg-F	TGTCCCACCAAGTGTGAAAA
mTg-R	CCAAGGAAAGCTTGTTCAGC
mNIS-F	GCTCAGTCTCGCTCAAAACC
mNIS-R	CGTGTGACAGGCCACATAAC
mTpo-F	TGACTTCCAGGAGCACACAG
mTpo-R	GCAAGTTCAGTGATGCCAGA
mPax8-F	CAGAAGGCGTTTGTGACAATGA
mPax8-R	TGCACTTTGGTCCGGATGAT
mTtf1-F	TCCAGCCTATCCCATCTGAACT
mTtf1-R	CAAGCGCATCTCACGTCTCA
mTshr-F	CTCTCTTACCCGAGCCACTG
mTshr-R	TTGTCACCCGGATCTTCTTC
mFoxe1-F	GGACCCTGCTACAATCCCG
mFoxe1-R	GCAGACACGAACCGATCCA
mHhex-F	CGGACGGTGAACGACTACAC
mHhex-R	CGTTGGAGAACCTCACTTGAC
mNis-F	GCTCAGTCTCGCTCAAAACC
mNis-R	CGTGTGACAGGCCACATAAC
mGapdh-F	AGGTCGGTGTGAACGGATTTG
mGapdh-R	TGTAGACCATGTAGTTGAGGTCA
Luciferase
Gene	Sequence
USP15-F	GGTACCGCCTTGAGCATGGTGCAAGTG
USP15-R	GGCTAGCCCTTCTTCCACTAGCGGTAG
